# Supplementary material for: Combined genetic and transcriptome analysis of patients with SLE: distinct, targetable signatures for susceptibility and severity
Source: PubMed Central journal article supplement — Ann Rheum Dis. 2019 Jun 5;78(8):1079–89. doi: 10.1136/annrheumdis-2018-214379 (PMC6691930; doi:10.1136/annrheumdis-2018-214379), 2019-06-05
Supplement: annrheumdis-2018-214379supp014.pdf [file annrheumdis-2018-214379supp014.pdf]

## Supplementary Figure 2

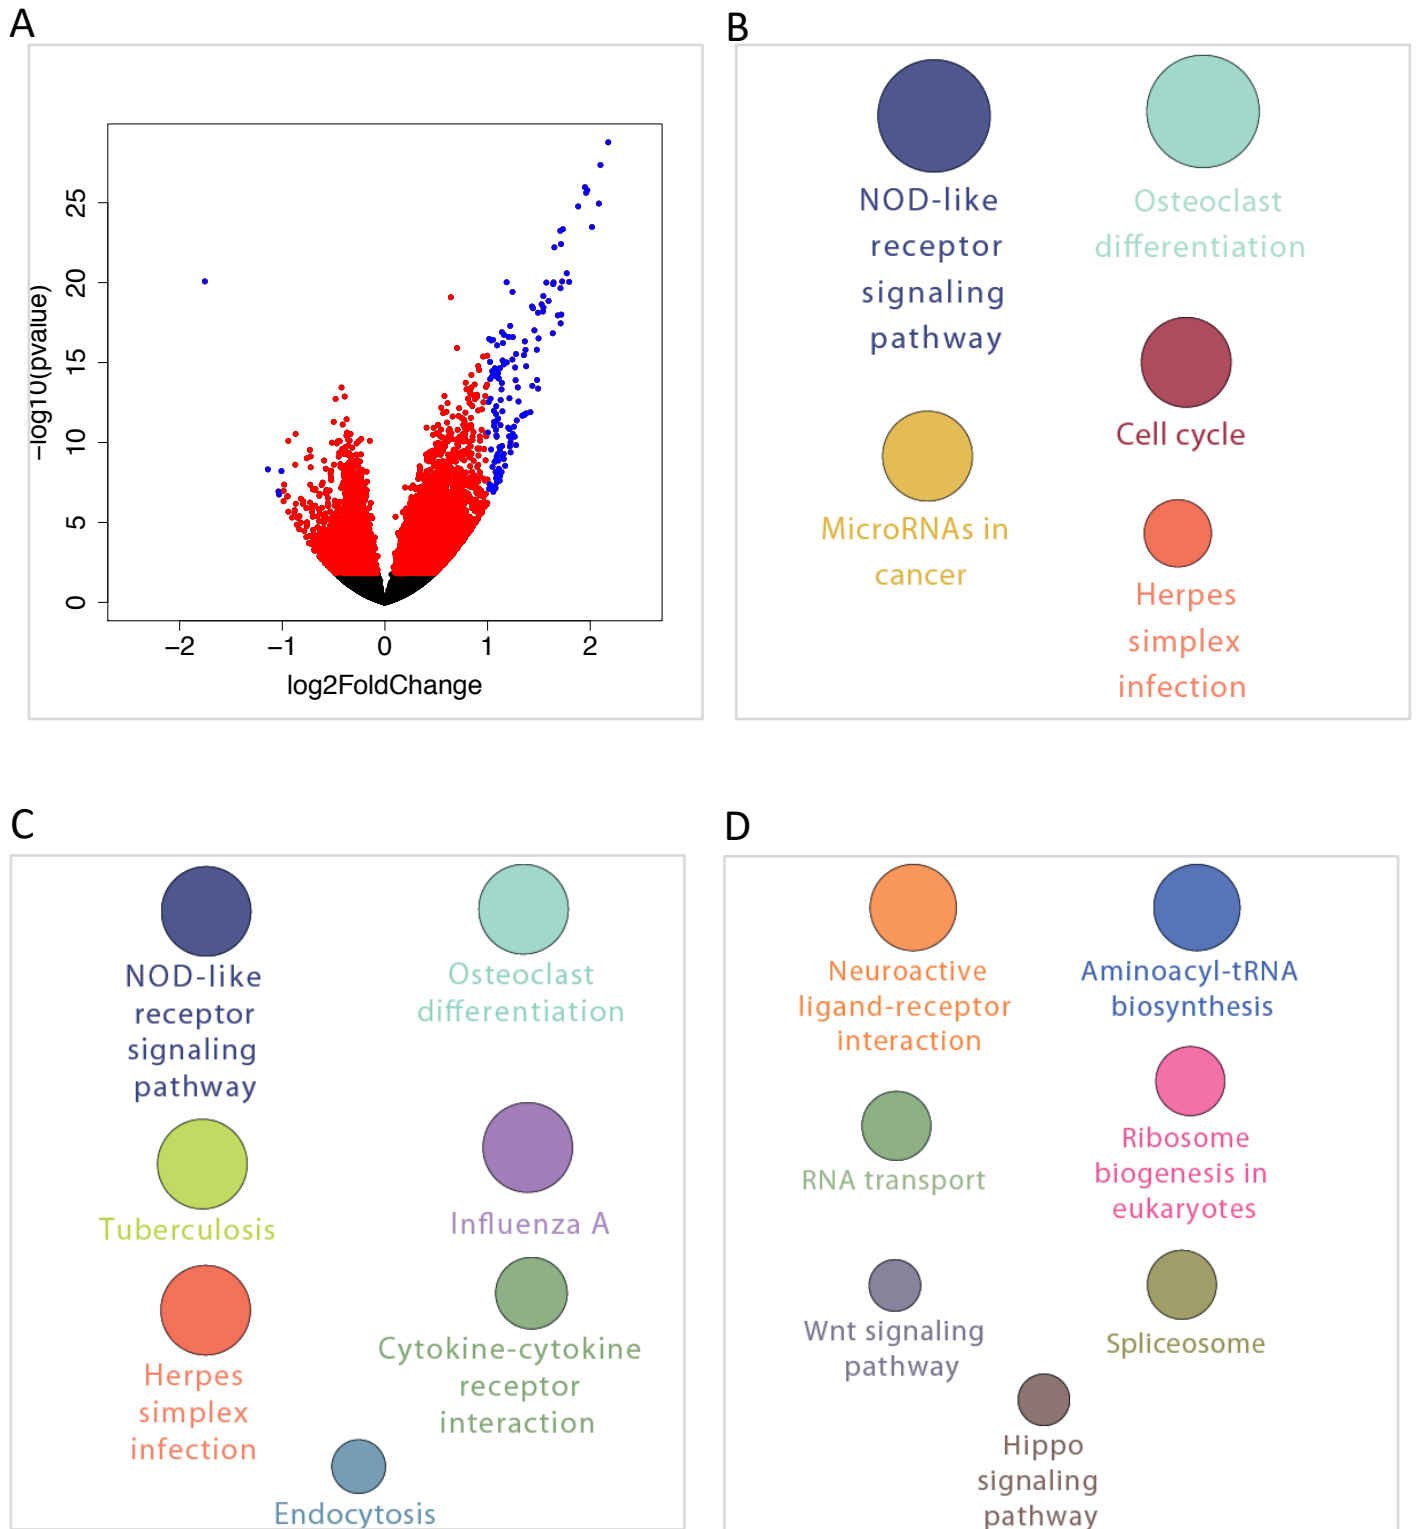

**Figure S2. Differential gene expression and pathway analyses in the peripheral blood of SLE patients compared to healthy individuals**

**(A)** Volcano plot of DEGs between SLE and healthy individuals. The x-axis indicates the log<sub>2</sub>-fold change (SLE over healthy) while the y-axis indicates the  $-\log_{10}$  of the Benjamini-Hochberg-adjusted p-value. Black dots indicate genes that do not pass the 5% FDR threshold of statistical significance, red dots indicate genes that do pass the 5% FDR threshold of statistical significance, and blue dots indicate genes that pass the significance threshold and have log<sub>2</sub>-fold change >1. Up-regulated genes (n=3977) outnumber down-regulated (n=2753) genes in SLE versus healthy individuals and demonstrate higher statistical significance. **(B)** Pathway enrichment analysis with all DEGs. Each circle represents a significantly enriched pathway. The size of the circle represents higher enrichment of the specific pathway. The enrichment p-values were calculated by a two-sided hypergeometric test and corrected for multiple testing with Bonferroni. The threshold for Bonferroni corrected p-values was set to 0.05. **(C)** Pathway enrichment analysis for the up-regulated DEGs in SLE. **(D)** Pathway enrichment analysis for the down-regulated DEGs in SLE.
