# Supplementary material for: Combined genetic and transcriptome analysis of patients with SLE: distinct, targetable signatures for susceptibility and severity
Source: PubMed Central journal article supplement — Ann Rheum Dis. 2019 Jun 5;78(8):1079–89. doi: 10.1136/annrheumdis-2018-214379 (PMC6691930; doi:10.1136/annrheumdis-2018-214379), 2019-06-05
Supplement: annrheumdis-2018-214379supp015.pdf [file annrheumdis-2018-214379supp015.pdf]

# Supplementary Figure 3

A

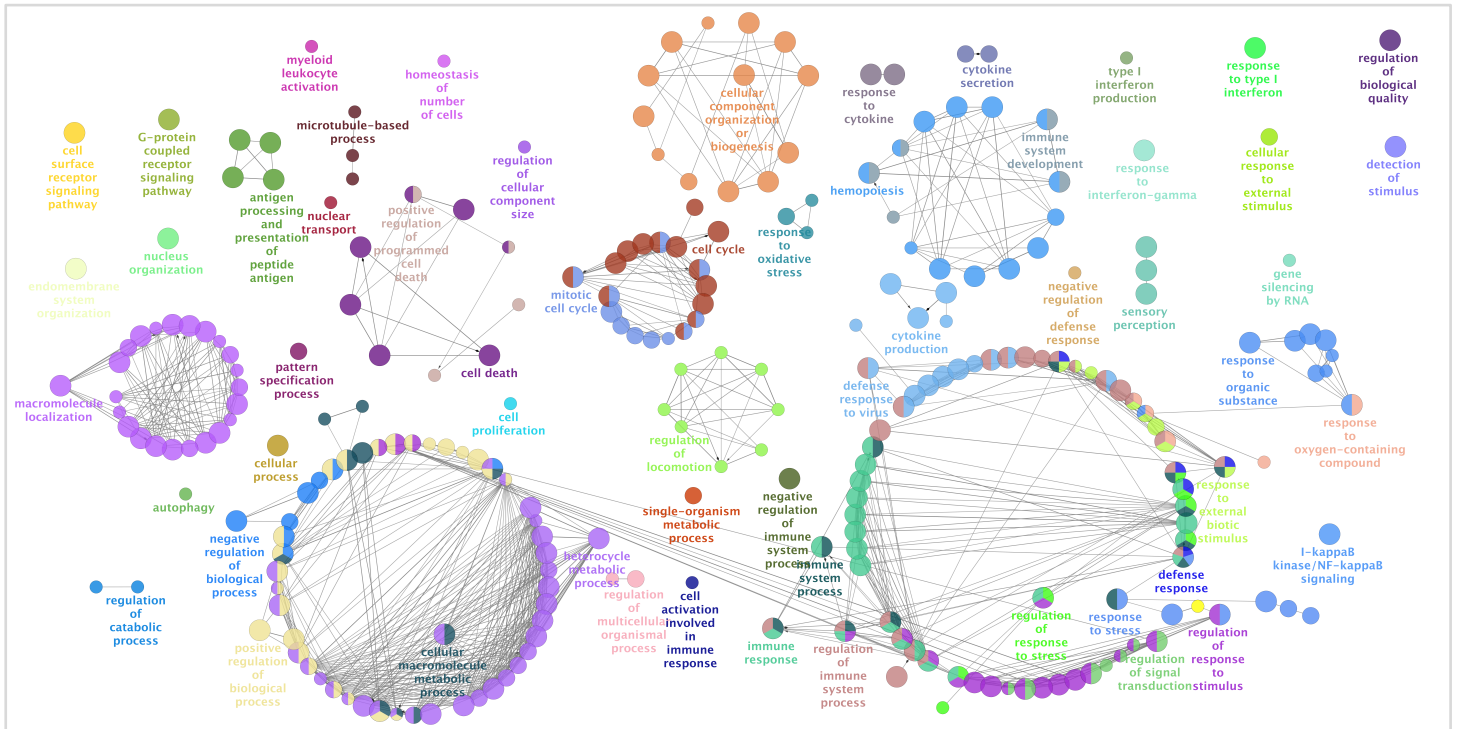

B

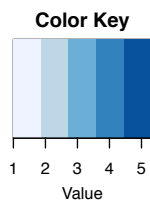

Odds Ratio

|      |        |       |                     |
|------|--------|-------|---------------------|
| N.S. | 1e-165 | 3e-35 | SLE_vs_Healthy      |
| --   | N.S.   | 1e-05 | Active_vs_Inactive  |
| --   | --     | 6e-62 | SLE_vs_Healthy.Pasc |

Active\_vs\_Inactive

SLE\_vs\_Healthy.Pasc

Active\_vs\_Inactive.Pasc

N.S.: Not Significant; --: Ignored

**Figure S3. Mechanistic map of the biological regulation in SLE and comparison of differentially expressed genes with external data.**

(A) For all DEGs, functionally-grouped networks of enriched GO term categories were generated. Each node represents a GO term and the size of each node represents the enrichment significance. The connection between nodes is based on Cohen's kappa statistic ( $\geq 0.4$ ) which depends on the gene sharing between nodes. For each network, only the most significant node is labelled. (B) Comparison of differentially expressed genes with data from a paediatric SLE study (Banchereau, ..., Pascual; Cell 2016). Fisher's exact p-values of overlap are plotted in accordance with the odds ratios denoted as heatmap.
