# Supplementary material for: Combined genetic and transcriptome analysis of patients with SLE: distinct, targetable signatures for susceptibility and severity
Source: PubMed Central journal article supplement — Ann Rheum Dis. 2019 Jun 5;78(8):1079–89. doi: 10.1136/annrheumdis-2018-214379 (PMC6691930; doi:10.1136/annrheumdis-2018-214379), 2019-06-05
Supplement: annrheumdis-2018-214379supp017.pdf [file annrheumdis-2018-214379supp017.pdf]

# Supplementary Figure 5

A

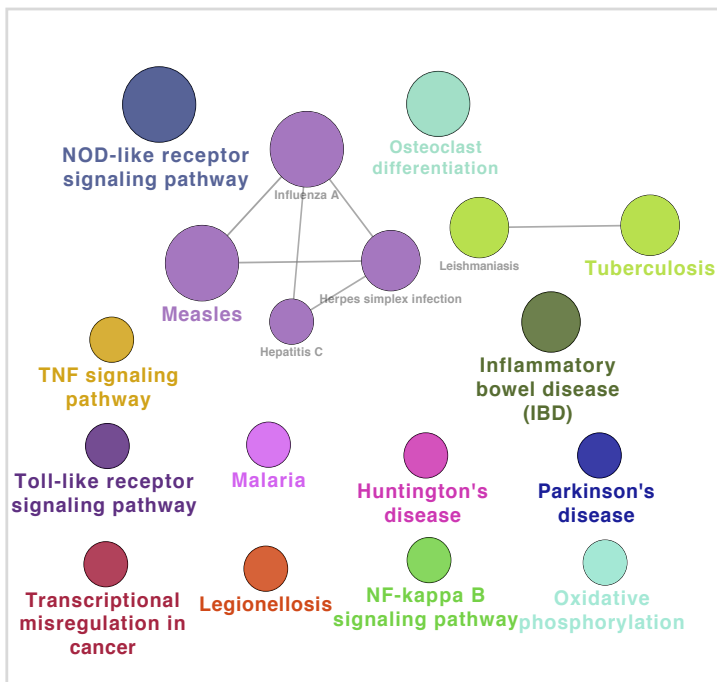

B

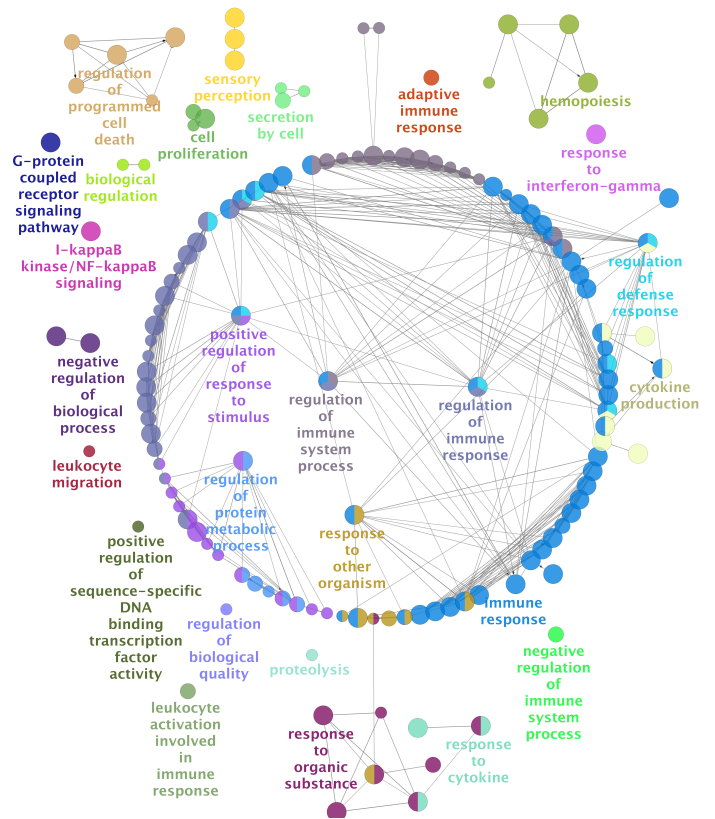

C

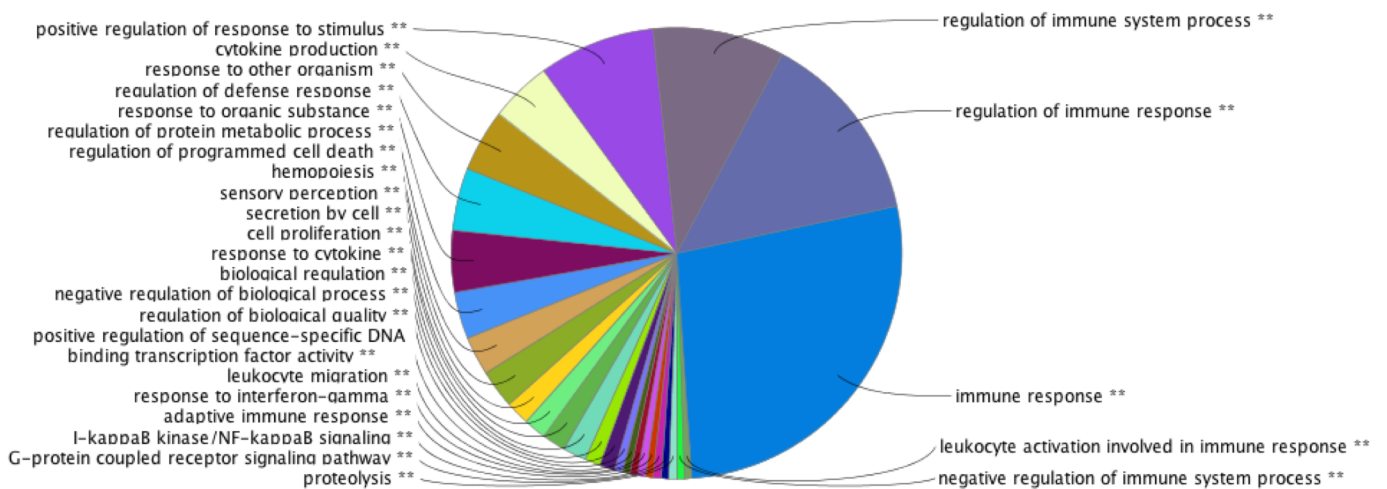

**Figure S5 . Enriched pathways and Mechanistic map of the biological regulation of the *susceptibility* SLE signature.**

**(A)** Pathway enrichment of the 2726 DEGs (5% FDR) defining the *susceptibility* disease signature. Each circle represents a significantly enriched pathway; the size of the circle represents the degree of enrichment. Enrichment p-values were calculated by a two-sided hypergeometric test and corrected for multiple testing with Benjamini-Hochberg. The threshold for corrected p-values was 0.05 (5% FDR) **(B)** Functionally grouped networks of enriched GO term categories were generated. Each node represents a GO term and the size of each node represents the enrichment significance. The connection between nodes is based on Cohen's *kappa* statistic ( $\geq 0.4$ ) that depends on the gene-sharing between nodes. For each network, only the most significant node is labelled. **(C)** Pie chart representation of the mechanistic map. More than half of the networks are related to immune system, responses and regulation.
