# Supplementary material for: Combined genetic and transcriptome analysis of patients with SLE: distinct, targetable signatures for susceptibility and severity
Source: PubMed Central journal article supplement — Ann Rheum Dis. 2019 Jun 5;78(8):1079–89. doi: 10.1136/annrheumdis-2018-214379 (PMC6691930; doi:10.1136/annrheumdis-2018-214379), 2019-06-05
Supplement: annrheumdis-2018-214379supp018.pdf [file annrheumdis-2018-214379supp018.pdf]

## Supplementary Figure 6

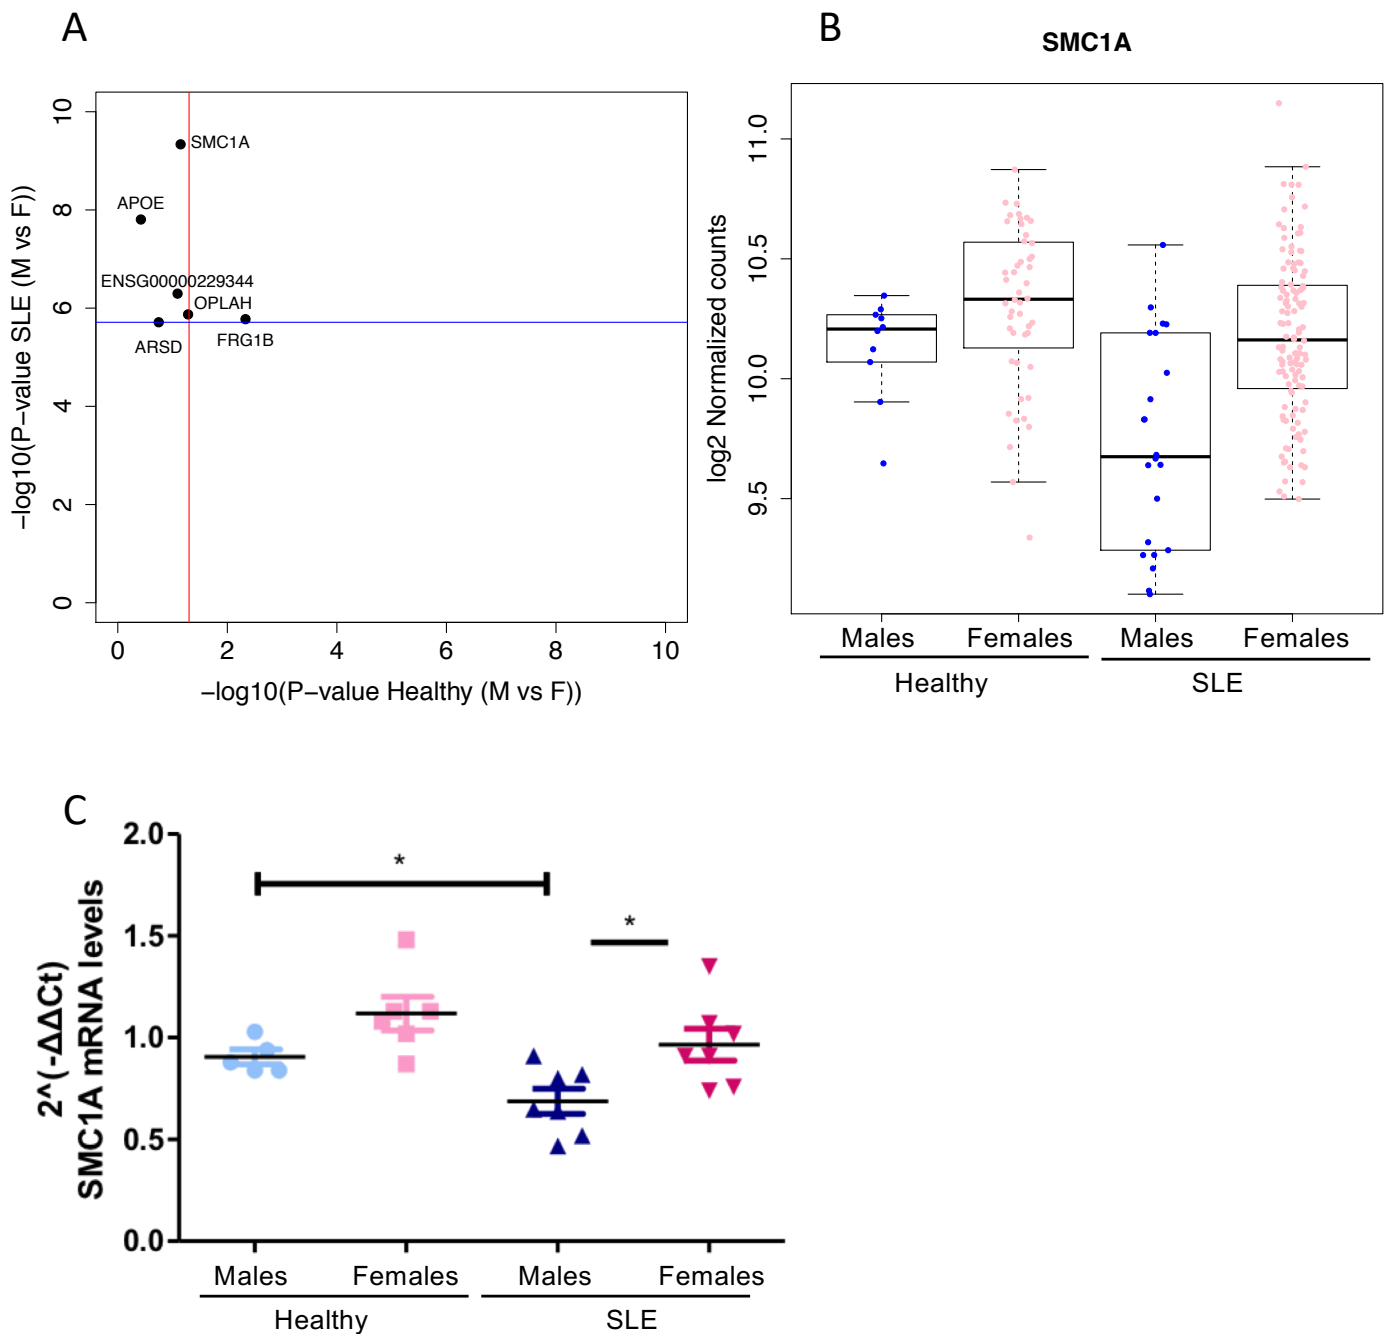

**Figure S6. SLE-specific gender differences in blood transcriptome**

(A) Genes with differential expression (Bonferroni significant) between male and female SLE patients that are not differentially expressed (90% FDR threshold) between male and female healthy individuals. The blue line indicates the Bonferroni p-value threshold while the red line is set at p-value 0.05. (B) Scatter plot with bar of SMC1A expression (normalized RNA-seq) levels in male and female SLE and healthy individuals. Bars represent median values. (C) Scatter plot of SMC1A mRNA expression in purified CD14<sup>+</sup> monocytes from the peripheral blood of male and female SLE and healthy individuals. Bars represent median values (two-way ANOVA [F (1, 20) = 11.48, p-value = 0.0029] followed by Tukey's multiple comparisons test; asterisk (\*) designates significant (p-value < 0.05) pairwise comparison).
