# Supplementary material for: Combined genetic and transcriptome analysis of patients with SLE: distinct, targetable signatures for susceptibility and severity
Source: PubMed Central journal article supplement — Ann Rheum Dis. 2019 Jun 5;78(8):1079–89. doi: 10.1136/annrheumdis-2018-214379 (PMC6691930; doi:10.1136/annrheumdis-2018-214379), 2019-06-05
Supplement: annrheumdis-2018-214379supp019.pdf [file annrheumdis-2018-214379supp019.pdf]

## Supplementary Figure 7

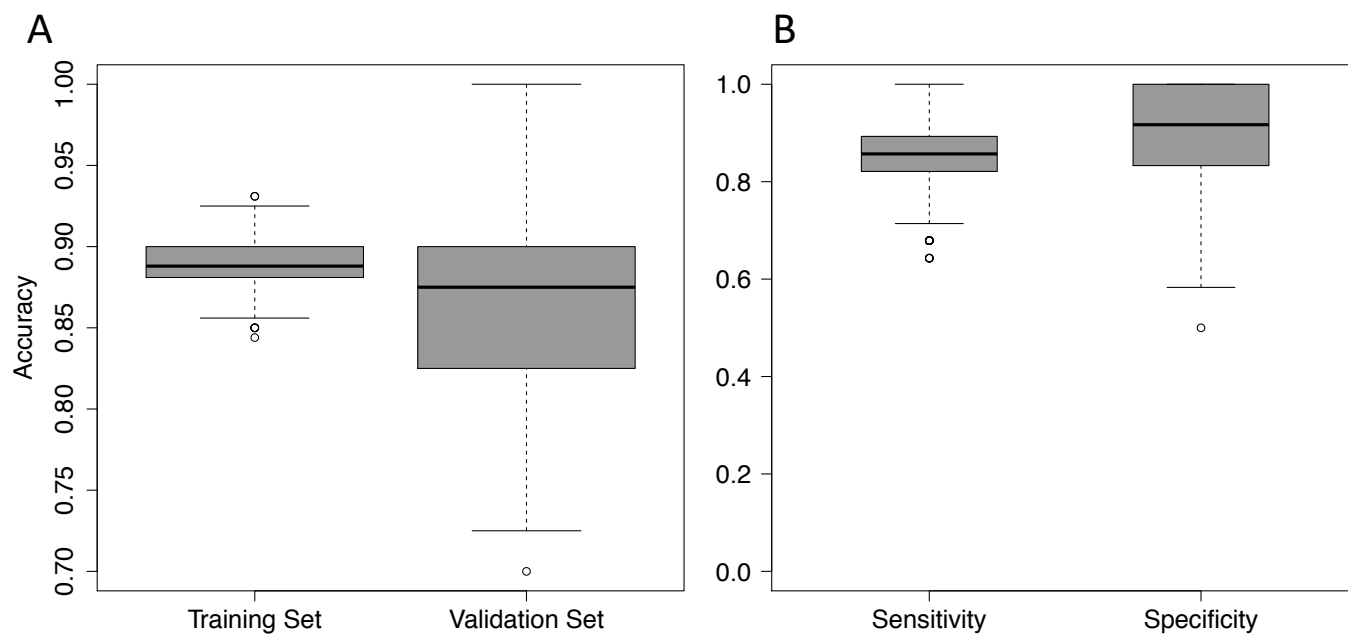

**Figure S7. Blood transcriptome accurately classifies SLE versus healthy individuals**

**(A)** Box-plot distribution of diagnostic accuracy (i.e., SLE versus healthy) after performing 1000 iterations for the training (80%) and validation (20%) set. Median accuracy is estimated at 0.875 for the validation set and 0.89 for the training set. **(B)** Box-plot distribution of sensitivity and specificity of the 1000 LDA classifiers. Median sensitivity is 0.86 and median specificity is 0.92.
