# Supplementary material for: Combined genetic and transcriptome analysis of patients with SLE: distinct, targetable signatures for susceptibility and severity
Source: PubMed Central journal article supplement — Ann Rheum Dis. 2019 Jun 5;78(8):1079–89. doi: 10.1136/annrheumdis-2018-214379 (PMC6691930; doi:10.1136/annrheumdis-2018-214379), 2019-06-05
Supplement: annrheumdis-2018-214379supp020.pdf [file annrheumdis-2018-214379supp020.pdf]

# Supplementary Figure 8

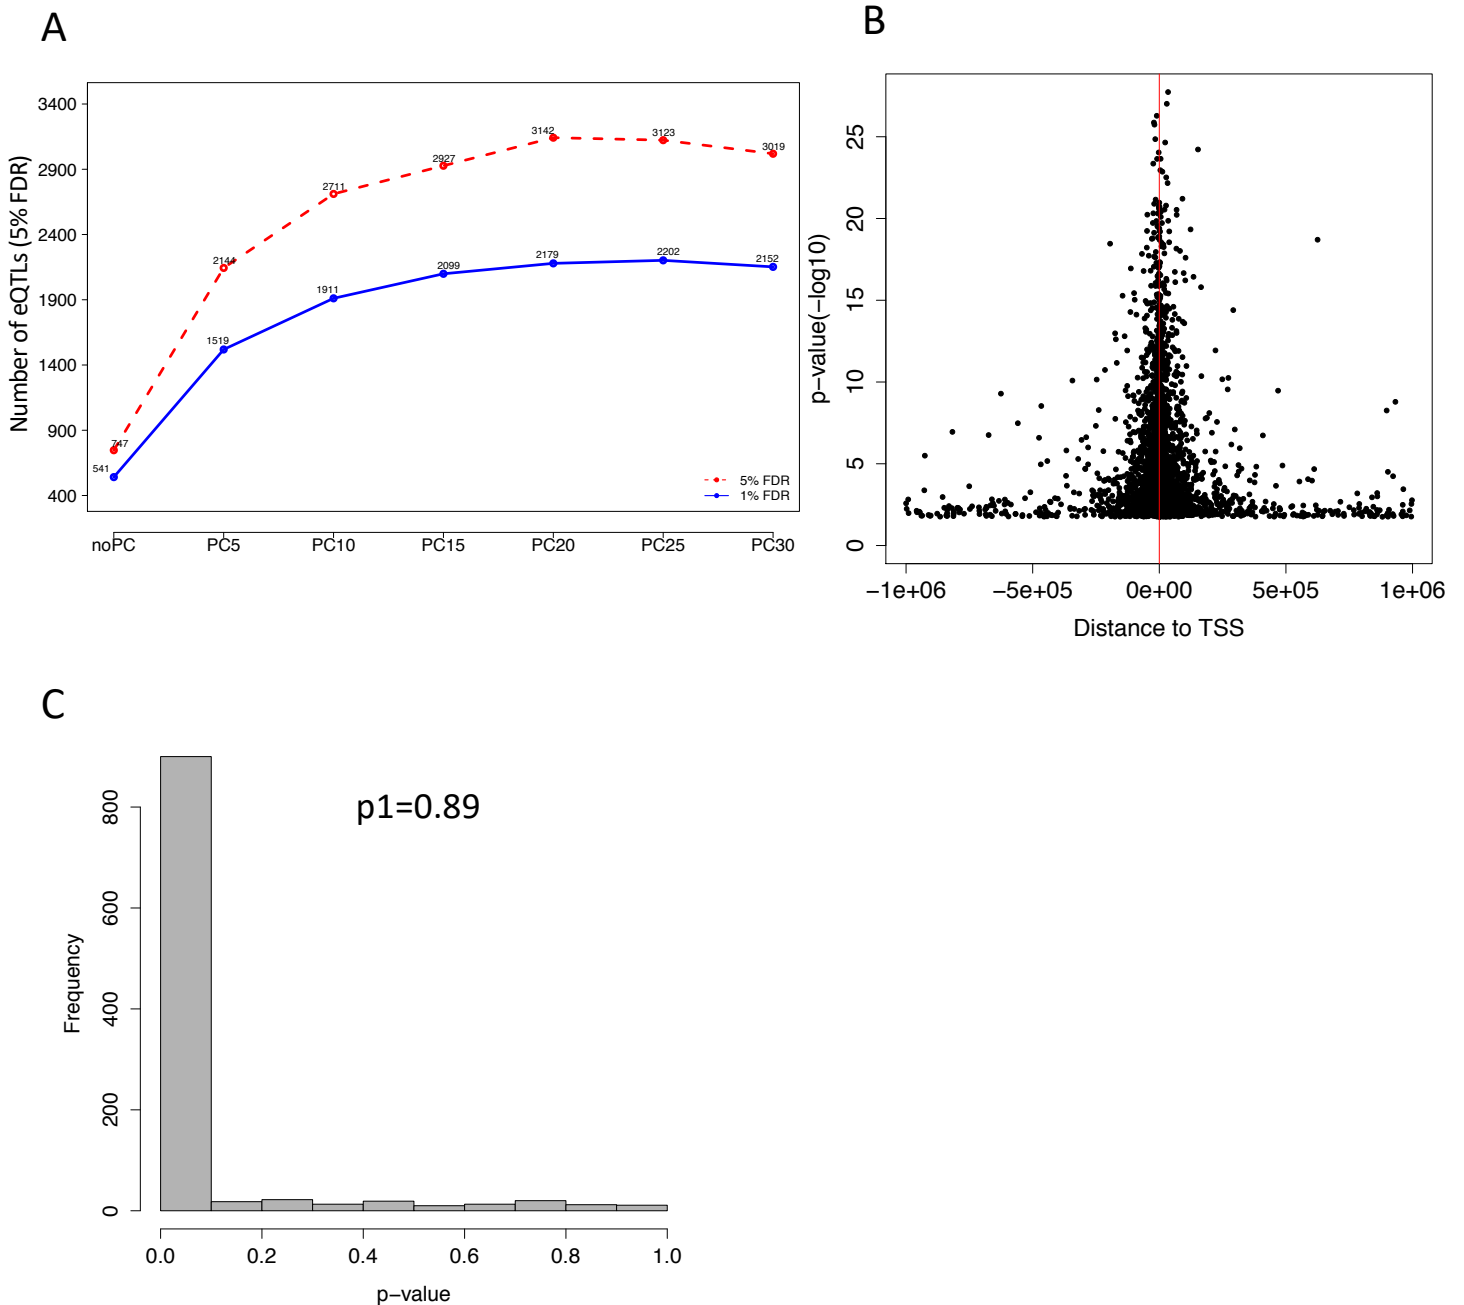

**Figure S8. Expression-QTL analysis in SLE blood transcriptome**

**(A)** Number of detected *cis*-eQTLs using 142 SLE individuals at 5% FDR (red dotted line) and at 1% FDR (blue line) without correction and by increasing number of principal components (PCs). The highest number of eQTLs (3142, 5% FDR) is detected by correcting for the first 20 PCs. **(B)** Distance of *cis*-eQTLs from the Transcriptional Start Site (TSS) of the genes. The significance of the associations is plotted on the y-axis ( $-\log_{10}$  p-value). Highly significant eQTLs are clustered close to TSS. **(C)** Replication of significant eQTLs identified in our SLE dataset with the results from a blood RNA-seq study in healthy donors ( $n=384$  samples).[41] The two sets of eQTLs replicated well ( $\pi_1=0.89$ ), suggesting the lack of SLE specificity.
